# Supplementary material for: Gd(iii) complex conjugated ultra-small iron oxide as an enhanced T1-weighted MR imaging contrast agent
Source: Royal Society of Chemistry journal article supplement (doi:10.1039/c4tb01981d), 2014-12-22
Supplement: c4tb01981d1.pdf [file c4tb01981d1.pdf]

## Electronic Supplementary Information

### Gd(III) Complex Conjugated Ultra-Small Iron Oxide as an Enhanced T1-weighted MR Imaging Contrast Agent

Li Wang<sup>a</sup>, Hongwei Zhang<sup>a</sup>, Zhiguo Zhou<sup>\*a</sup>, Bin Kong<sup>a</sup>, Lu An<sup>a</sup>, Jie Wei<sup>a</sup>, Hong Yang<sup>a</sup>, Jiangmin Zhao<sup>\*b</sup>, and Shiping Yang<sup>\*a,b</sup>

<sup>a</sup> The Key Laboratory of Resource Chemistry of Ministry of Education, Shanghai Key Laboratory of Rare Earth Functional Materials, and Shanghai Municipal Education Committee Key Laboratory of Molecular Imaging Probes and Sensors, Shanghai Normal University, Shanghai 200234, China.

E-mail: zgzhou@shnu.edu.cn, johnzhao@sjtu.edu.cn, shipingyang@shnu.edu.cn; Fax: 86-21-64322343

<sup>b</sup> No. 3 People Hospital Affiliated to Shanghai Jiao Tong University School of Medicine, shanghai, 201999, China

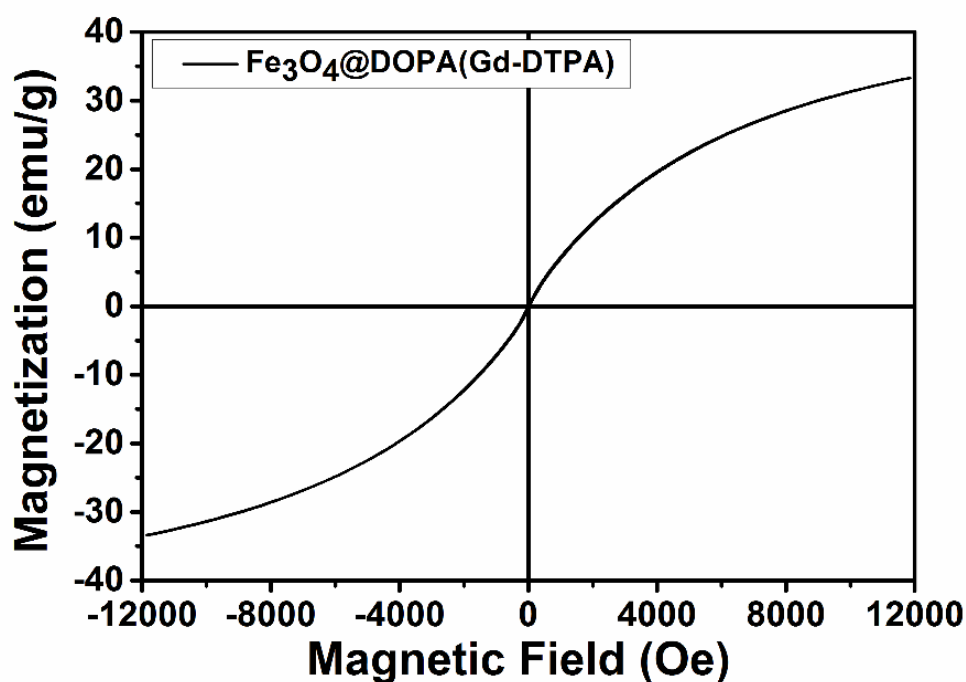

Figure S1. The hysteresis loop of Fe<sub>3</sub>O<sub>4</sub>@DOPA(Gd-DTPA) NPs.

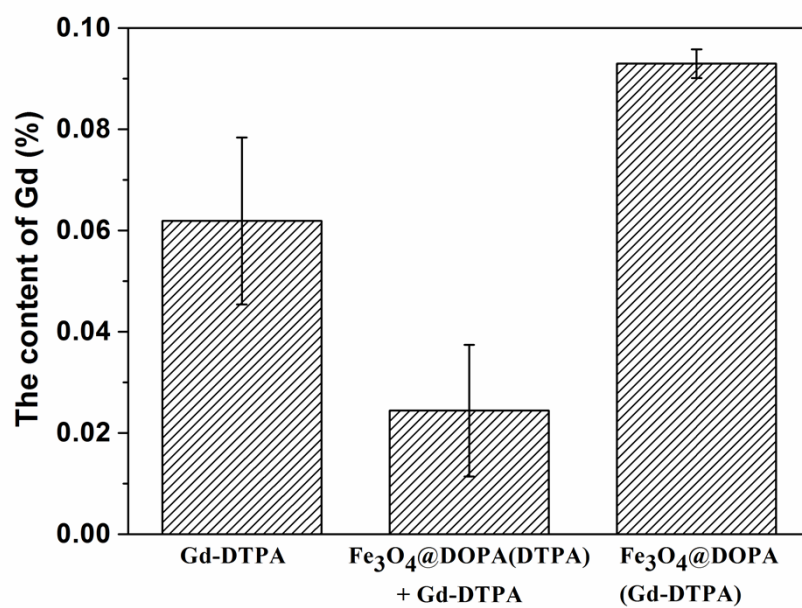

**Figure S2.** The contents of Gd in the cells after incubation with Gd-DTPA, Fe<sub>3</sub>O<sub>4</sub>@DOPA(DTPA) plus Gd-DTPA, and Fe<sub>3</sub>O<sub>4</sub>@DOPA(Gd-DTPA) NPs, respectively.
